# Supplementary material for: Ln3+ post-functionalized metal–organic frameworks for color tunable emission and highly sensitive sensing of toxic anions and small molecules
Source: Royal Society of Chemistry journal article supplement (doi:10.1039/c5nj03419a), 2016-01-01
Supplement: c5nj03419a1.pdf [file c5nj03419a1.pdf]

## Supporting information

### **Ln<sup>3+</sup> post-functionalized metal-organic framework for color tunable emission and highly-sensitivity sensing of toxic anions and small molecules**

Ji-Na Hao and Bing Yan\*

Department of Chemistry, Tongji University, Siping Road 1239, Shanghai 200092, China

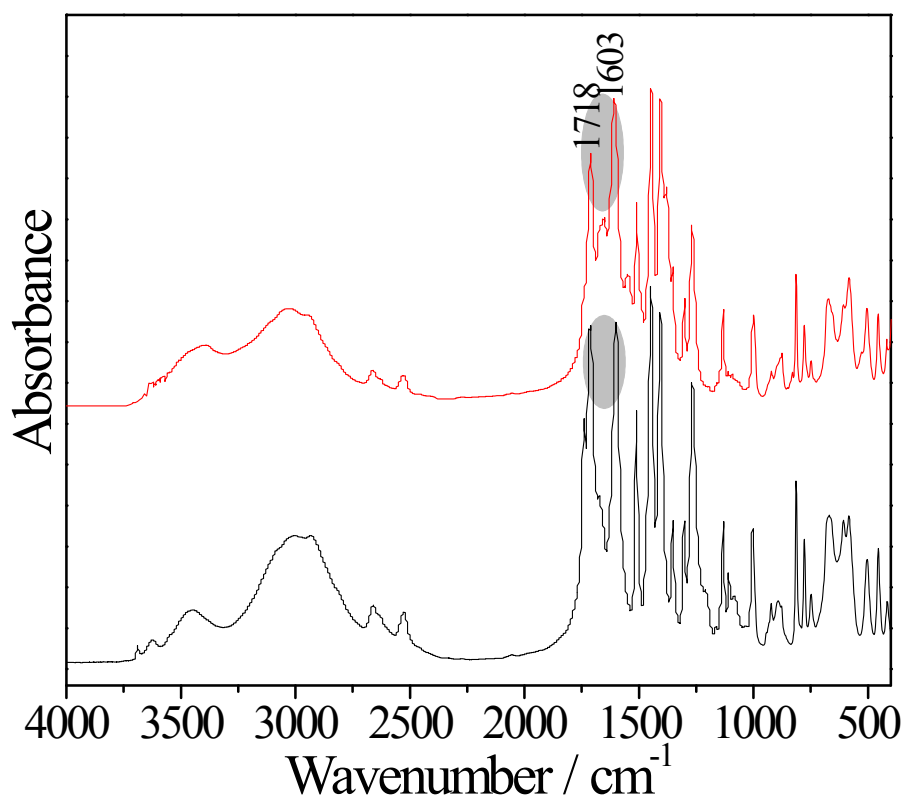

**Figure S1.** FTIR spectra of MIL-121 (black line) and Eu<sup>3+</sup>@MIL-121 (red line), the peaks at 1718 cm<sup>-1</sup> and 1603 cm<sup>-1</sup> are ascribed to the stretching vibration of C=O from the free and coordinated carboxyl, respectively.

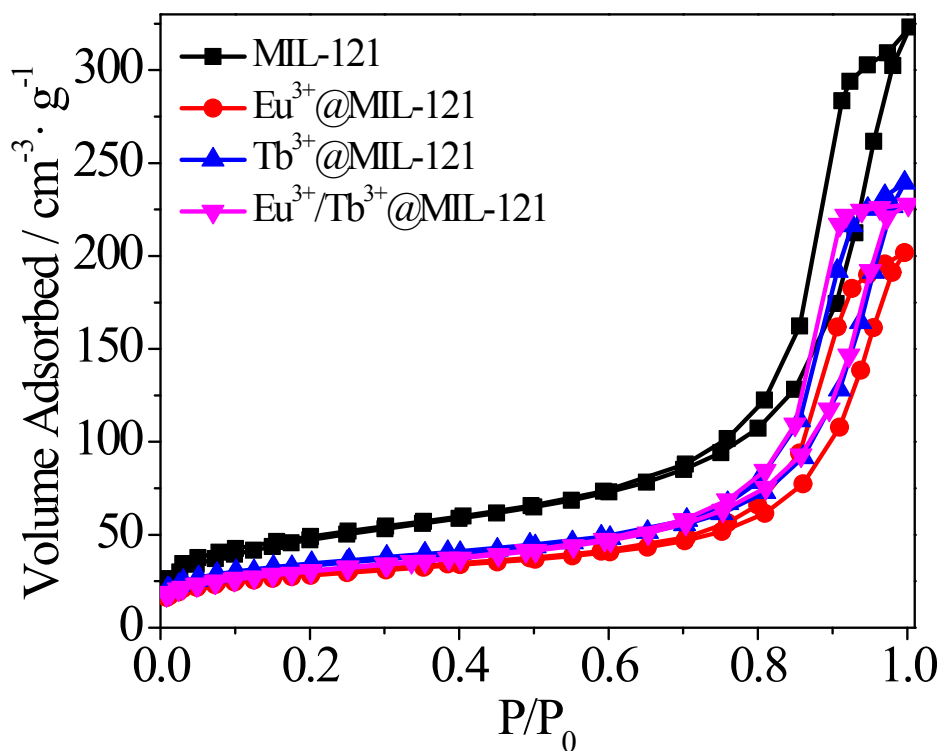

**Figure S2.** N<sub>2</sub> adsorption–desorption isotherms of MIL-121 and Ln<sup>3+</sup>@MIL-121 (Ln = Eu, Tb, Eu/Tb)

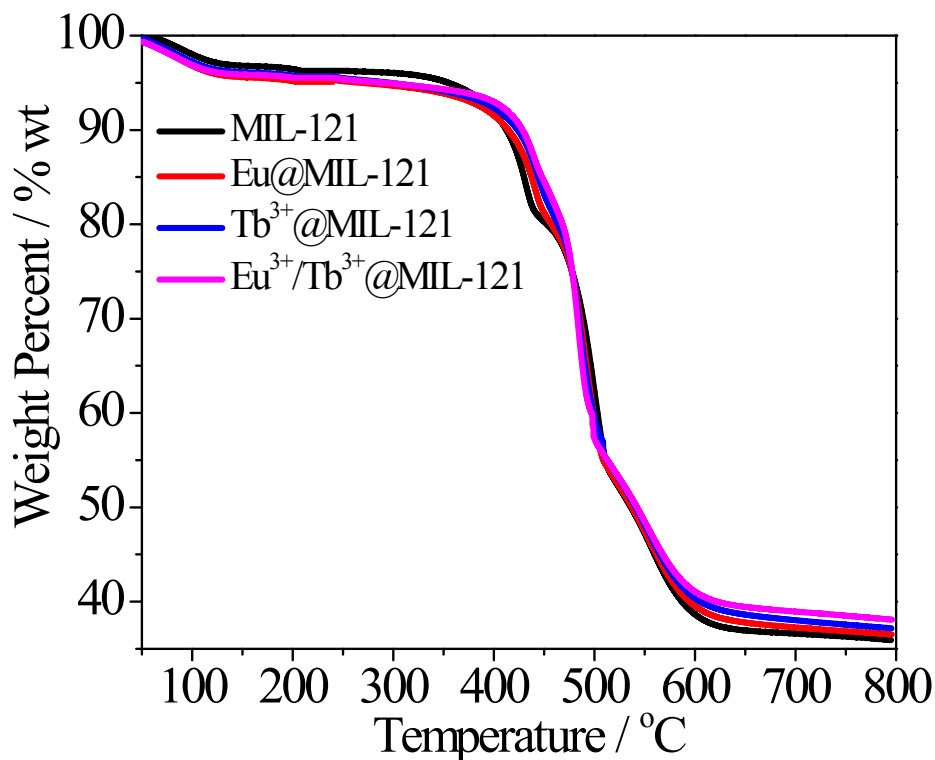

**Figure S3.** TGA curves of MIL-121 and Ln<sup>3+</sup>@MIL-121. Thermogravimetric analysis (TGA) reveals that MIL-121 can be stable up to 400 °C. The TG curve of MIL-121 presents two events. The first one is the elimination of the trapped solvent in the pores (~2 wt%). After a plateau up to 400 °C, the decomposition of the organic ligand occurs (obs. 63 wt%; calc. 68.6 wt%).

**Table S1.** The ICPMS results of Ln<sup>3+</sup>@MIL-121 (Ln = Eu, Tb, Eu/Tb)

| compounds                                   | Al <sup>3+</sup> (ppm) | Eu <sup>3+</sup> (ppm) | Tb <sup>3+</sup> (ppm) | Al <sup>3+</sup> : Ln <sup>3+</sup> |
|---------------------------------------------|------------------------|------------------------|------------------------|-------------------------------------|
| Eu <sup>3+</sup> @MIL-121                   | 6.98                   | 3.50                   | --                     | 2:1                                 |
| Tb <sup>3+</sup> @MIL-121                   | 12.71                  | --                     | 6.51                   | 1.95:1                              |
| Eu <sup>3+</sup> /Tb <sup>3+</sup> @MIL-121 | 10.62                  | 2.21                   | 3.46                   | 4.8:1:1.56                          |

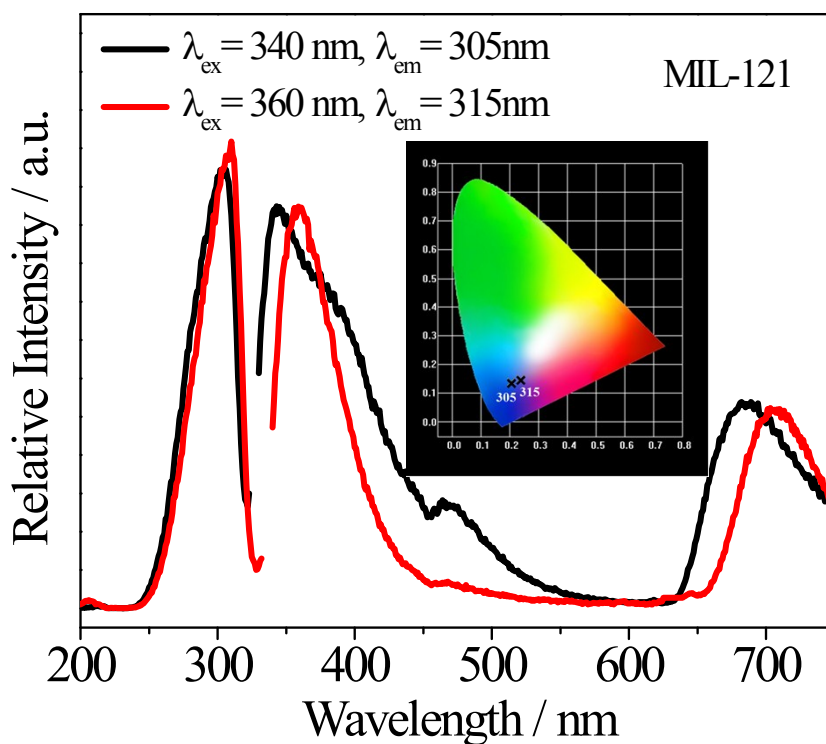**Figure S4.** Excitation and emission spectra of MIL-121. The inset shows its corresponding CIE chromaticity diagram ( $\lambda_{\text{ex}}= 305$  nm, CIE x: 0.204; CIE y: 0.139;  $\lambda_{\text{ex}}= 315$  nm, CIE x: 0.2371; CIE y: 0.1502).**Table S2.** Luminescence Lifetimes ( $\tau$ ) and Absolute Quantum Yields ( $\phi$ ) of Ln<sup>3+</sup>@MIL-121 (Ln = Eu, Tb, Eu/Tb).

| Ln <sup>3+</sup>                   | $\tau$ ( $\mu\text{s}$ ) | $\Phi$ (%) | $\lambda_{\text{ex}}$ (nm) | $\lambda_{\text{em}}$ (nm) |
|------------------------------------|--------------------------|------------|----------------------------|----------------------------|
| Eu <sup>3+</sup>                   | 307                      | 6          | 315                        | 615                        |
| Tb <sup>3+</sup>                   | 538                      | 11         | 318                        | 545                        |
| Eu <sup>3+</sup> /Tb <sup>3+</sup> | 280                      | 8          | 317                        | 615                        |
| Eu <sup>3+</sup> /Tb <sup>3+</sup> | 399                      |            | 317                        | 545                        |

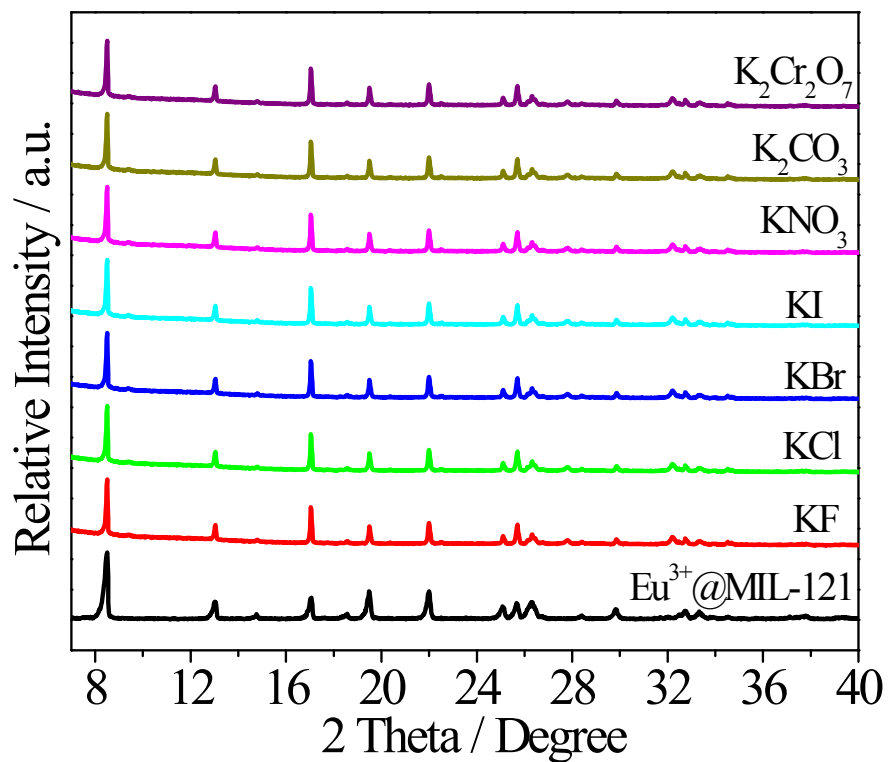

**Figure S5.** The PXRD patterns of the  $Eu^{3+}@MIL-121$  treated by various anion aqueous solutions.

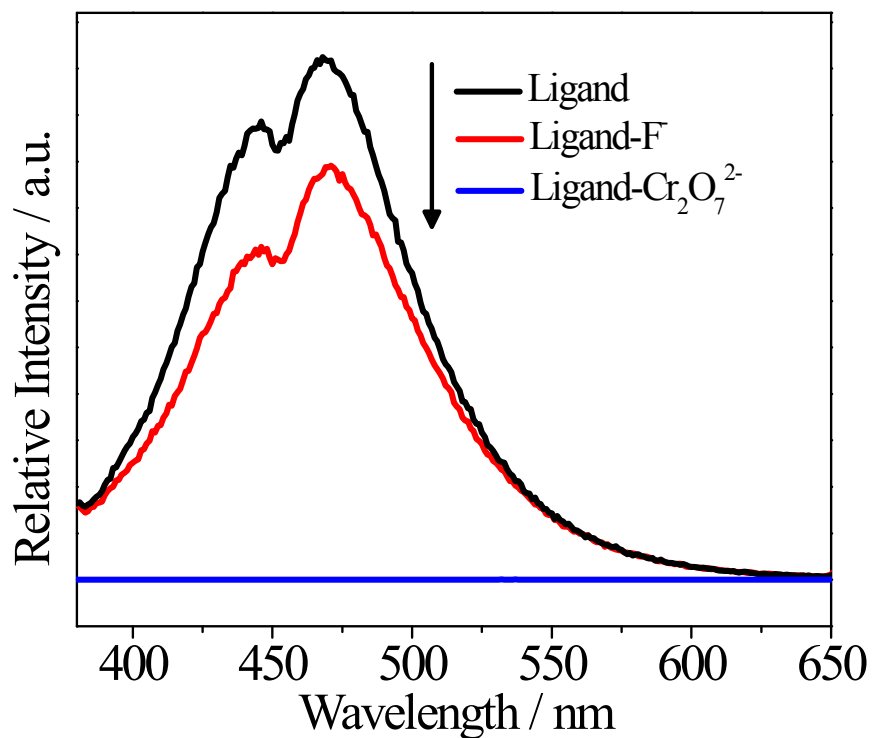

**Figure S6.** Responses of the fluorescence of pure ligand ( $H_4btec$ ) towards aqueous solutions of  $F^-$  and  $Cr_2O_7^{2-}$ , respectively.

**Table S3.** The luminescence lifetimes for the  ${}^5D_0 \rightarrow {}^7F_2$  (615 nm) emission of  $\text{Eu}^{3+}@MIL-121$  after immersing in the aqueous solutions of various anions ( $\lambda_{\text{ex}}=315$  nm).

| Materials                         | $\tau$ ( $\mu\text{s}$ ) |
|-----------------------------------|--------------------------|
| $\text{K}_2\text{CO}_3$           | 311                      |
| $\text{H}_2\text{O}$              | 237.6                    |
| KCl                               | 184.5                    |
| KI                                | 188.6                    |
| $\text{KNO}_3$                    | 186.0                    |
| KBr                               | 183.2                    |
| KF                                | 50.9                     |
| $\text{K}_2\text{Cr}_2\text{O}_7$ | undetectable             |

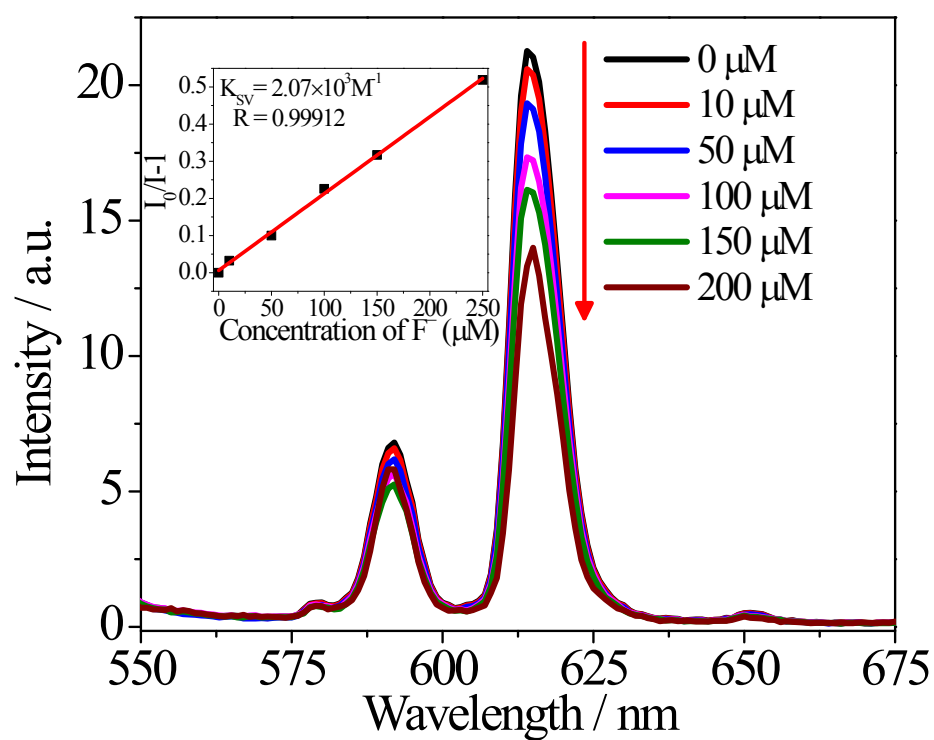

**Figure S7.** Emission spectra and the  $K_{\text{sv}}$  curve (inset) of  $\text{Eu}^{3+}@MIL-121$  in aqueous solutions in the presence of various concentrations of  $\text{F}^-$  under excitation at 315 nm.

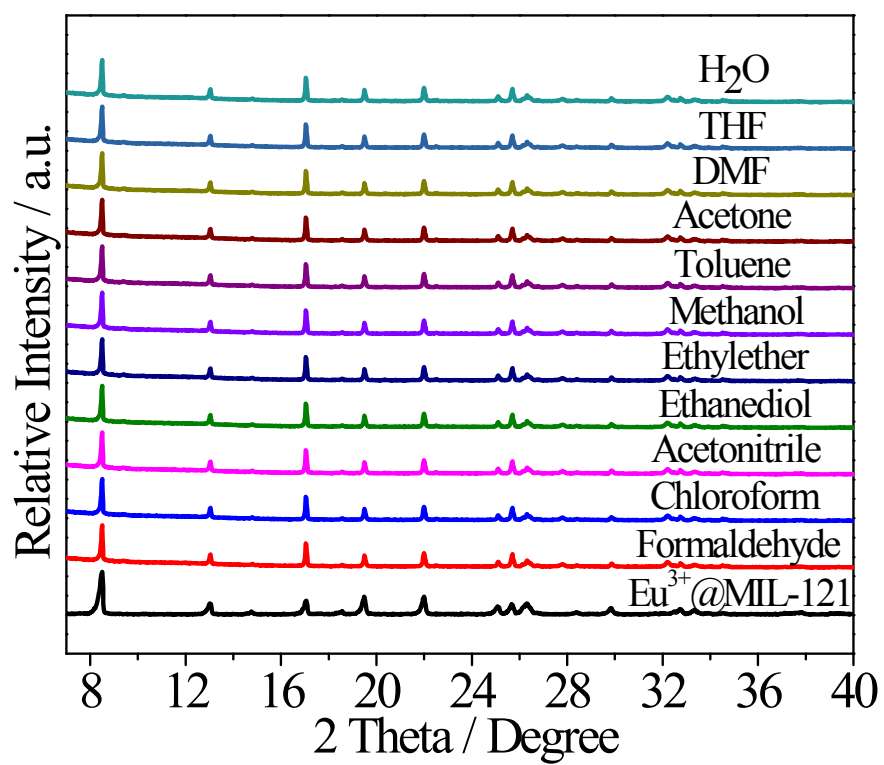

**Figure S8.** The PXRD patterns of Eu<sup>3+</sup>@MIL-121 treated by different solvents.
